# Supplementary material for: Alternative treatments to treat perforated peptic ulcer: a systematic review and network meta-analysis of randomized controlled trials
Source: Springer Nature journal article supplement (doi:10.1186/s13017-025-00599-2), 2025-04-11
Supplement: MOESM1 [file 13017_2025_599_MOESM1_ESM.docx]

**Supplementary Table 1. Excluded studies**

1. Alhaj Saleh A, Esquivel EC, Lung JT, Eaton BC, Bruns BR, Barmparas G, Margulies DR, Raines A, Bryant C, Crane CE, Scherer EP, Schroeppel TJ, Moskowitz E, Regner J, Frazee R, Campion EM, Bartley M, Mortus J, Ward J, Almekdash MH, Dissanaike S. Laparoscopic omental patch for perforated peptic ulcer disease reduces length of stay and complications, compared to open surgery: A SWSC multicenter study. Am J Surg. 2019 Dec;218(6):1060-1064. doi: 10.1016/j.amjsurg.2019.09.002. Epub 2019 Sep 11. PMID: 31537324.
2. Bhogal RH, Athwal R, Durkin D, Deakin M, Cheruvu CN. Comparison between open and laparoscopic repair of perforated peptic ulcer disease. World J Surg. 2008 Nov;32(11):2371-4. doi: 10.1007/s00268-008-9707-5. PMID: 18758854.
3. Byrge N, Barton RG, Enniss TM, Nirula R. Laparoscopic versus open repair of perforated gastroduodenal ulcer: a National Surgical Quality Improvement Program analysis. Am J Surg. 2013 Dec;206(6):957-62; discussion 962-3. doi: 10.1016/j.amjsurg.2013.08.014. Epub 2013 Oct 8. PMID: 24112676.
4. Çelik MF, Dural AC, Akarsu C, Ünsal MG, Gök İ, Köneş O, Gönenç M, Alış H. The growing role of laparoscopic repair in patients with early diagnosed peptic ulcer perforation. Ulus Cerrahi Derg. 2014 Sep 1;30(3):120-4. doi: 10.5152/UCD.2014.2640. PMID: 25931911; PMCID: PMC4379850.
5. Critchley AC, Phillips AW, Bawa SM, Gallagher PV. Management of perforated peptic ulcer in a district general hospital. Ann R Coll Surg Engl. 2011 Nov;93(8):615-9. doi: 10.1308/003588411X13165261994030. PMID: 22041238; PMCID: PMC3566687.
6. Davenport DL, Ueland WR, Kumar S, Plymale M, Bernard AC, Roth JS. A comparison of short-term outcomes between laparoscopic and open emergent repair of perforated peptic ulcers. Surg Endosc. 2019 Mar;33(3):764-772. doi: 10.1007/s00464-018-6341-7. Epub 2018 Jul 11. PMID: 29998395.
7. Golash V. Ten-Year Retrospective Comparative Analysis of Laparoscopic Repair versus Open Closure of Perforated. Oman Med J. 2008 Oct;23(4):241-6. PMID: 22334835; PMCID: PMC3273918.
8. Jamal MH, Karam A, Alsharqawi N, Buhamra A, AlBader I, Al-Abbad J, Dashti M, Abulhasan YB, Almahmeed H, AlSabah S. Laparoscopy in Acute Care Surgery: Repair of Perforated Duodenal Ulcer. Med Princ Pract. 2019;28(5):442-448. doi: 10.1159/000500107. Epub 2019 Apr 16. PMID: 30995637; PMCID: PMC6771047.
9. Jayaraman SS, Allen R, Feather C, Turcotte J, Klune JR. Outcomes of Laparoscopic vs Open Repair of Perforated Peptic Ulcers: An ACS-NSQIP Study. J Surg Res. 2021 Sep;265:13-20. doi: 10.1016/j.jss.2021.02.030. Epub 2021 Apr 15. PMID: 33866049.
10. Kirshtein B, Bayme M, Mayer T, Lantsberg L, Avinoach E, Mizrahi S. Laparoscopic treatment of gastroduodenal perforations: comparison with conventional surgery. Surg Endosc. 2005 Nov;19(11):1487-90. doi: 10.1007/s00464-004-2237-9. Epub 2005 Sep 27. PMID: 16222472.
11. Kok KY, Mathew VV, Yapp SK. Laparoscopic omental patch repair for perforated duodenal ulcer. Am Surg. 1999 Jan;65(1):27-30. PMID: 9915527.
12. Kuwabara K, Matsuda S, Fushimi K, Ishikawa KB, Horiguchi H, Fujimori K. Community-based evaluation of laparoscopic versus open simple closure of perforated peptic ulcers. World J Surg. 2011 Nov;35(11):2485-92. doi: 10.1007/s00268-011-1252-y. PMID: 21915743.
13. Laforgia R, Balducci G, Carbotta G, Prestera A, Sederino MG, Casamassima G, Minafra M, Sallustio P, Palasciano N. Laparoscopic and Open Surgical Treatment in Gastroduodenal Perforations: Our Experience. Surg Laparosc Endosc Percutan Tech. 2017 Apr;27(2):113-115. doi: 10.1097/SLE.0000000000000376. PMID: 28207574; PMCID: PMC5377998.
14. Lee DJ, Ye M, Sun KH, Shelat VG, Koura A. Laparoscopic versus Open Omental Patch Repair for Early Presentation of Perforated Peptic Ulcer: Matched Retrospective Cohort Study. Surg Res Pract. 2016;2016:8605039. doi: 10.1155/2016/8605039. Epub 2016 Sep 19. PMID: 27722200; PMCID: PMC5046012.
15. Lunevicius R, Morkevicius M. Comparison of laparoscopic versus open repair for perforated duodenal ulcers. Surg Endosc. 2005 Dec;19(12):1565-71. doi: 10.1007/s00464-005-0146-1. Epub 2005 Oct 5. PMID: 16211440.
16. Malkov IS, Zaynutdinov AM, Veliyev NA, Tagirov MR, Merrell RC. Laparoscopic and endoscopic management of perforated duodenal ulcers. J Am Coll Surg. 2004 Mar;198(3):352-5. doi: 10.1016/j.jamcollsurg.2003.10.015. PMID: 14992735.
17. Matsuda M, Nishiyama M, Hanai T, Saeki S, Watanabe T. Laparoscopic omental patch repair for perforated peptic ulcer. Ann Surg. 1995 Mar;221(3):236-40. doi: 10.1097/00000658-199503000-00004. PMID: 7717776; PMCID: PMC1234564.
18. Michelet I, Agresta F. Perforated peptic ulcer: laparoscopic approach. Eur J Surg. 2000 May;166(5):405-8. doi: 10.1080/110241500750008989. PMID: 10881954.
19. Minutolo V, Gagliano G, Rinzivillo C, Minutolo O, Carnazza M, Racalbuto A, Dipietro S, Li Destri G. Laparoscopic surgical treatment of perforated duodenal ulcer. Chir Ital. 2009 May-Jun;61(3):309-13. PMID: 19694232.
20. Mirabella A, Fiorentini T, Tutino R, Falco N, Fontana T, De Marco P, Gulotta E, Gulotta L, Licari L, Salamone G, Melfa I, Scerrino G, Lupo M, Speciale A, Cocorullo G. Laparoscopy is an available alternative to open surgery in the treatment of perforated peptic ulcers: a retrospective multicenter study. BMC Surg. 2018 Sep 25;18(1):78. doi: 10.1186/s12893-018-0413-4. PMID: 30253756; PMCID: PMC6156951.
21. Miserez M, Eypasch E, Spangenberger W, Lefering R, Troidl H. Laparoscopic and conventional closure of perforated peptic ulcer. A comparison. Surg Endosc. 1996 Aug;10(8):831-6. doi: 10.1007/BF00189544. PMID: 8694948.
22. Muller MK, Wrann S, Widmer J, Klasen J, Weber M, Hahnloser D. Perforated Peptic Ulcer Repair: Factors Predicting Conversion in Laparoscopy and Postoperative Septic Complications. World J Surg. 2016 Sep;40(9):2186-93. doi: 10.1007/s00268-016-3516-z. PMID: 27119515.
23. Murad MF, Khan R, Tariq M, Akram A, Merrell RC, Zafar A. Laparoscopy: A Better Approach for Perforated Duodenal Ulcer. Cureus. 2020 Oct 15;12(10):e10953. doi: 10.7759/cureus.10953. PMID: 33209516; PMCID: PMC7667608.
24. Naesgaard JM, Edwin B, Reiertsen O, Trondsen E, Faerden AE, Rosseland AR. Laparoscopic and open operation in patients with perforated peptic ulcer. Eur J Surg. 1999 Mar;165(3):209-14. doi: 10.1080/110241599750007063. PMID: 10231653.
25. Pelloni M, Afonso-Luís N, Marchena-Gomez J, Piñero-González L, Ortíz-López D, Acosta-Mérida MA, Rahy-Martín A. Comparative study of postoperative complications after open and laparoscopic surgery of the perforated peptic ulcer: Advantages of the laparoscopic approach. Asian J Surg. 2022 Apr;45(4):1007-1013. doi: 10.1016/j.asjsur.2021.08.059. Epub 2021 Sep 27. PMID: 34593282.
26. Pereira A, Santos Sousa H, Gonçalves D, Lima da Costa E, Costa Pinho A, Barbosa E, Barbosa J. Surgery for Perforated Peptic Ulcer: Is Laparoscopy a New Paradigm? Minim Invasive Surg. 2021 May 12;2021:8828091. doi: 10.1155/2021/8828091. PMID: 34055409; PMCID: PMC8133844.
27. Seelig MH, Seelig SK, Behr C, Schönleben K. Comparison between open and laparoscopic technique in the management of perforated gastroduodenal ulcers. J Clin Gastroenterol. 2003 Sep;37(3):226-9. doi: 10.1097/00004836-200309000-00007. PMID: 12960721.
28. Siow SL, Mahendran HA, Wong CM, Hardin M, Luk TL. Laparoscopic versus open repair of perforated peptic ulcer: Improving outcomes utilizing a standardized technique. Asian J Surg. 2018 Mar;41(2):136-142. doi: 10.1016/j.asjsur.2016.11.004. Epub 2016 Dec 7. PMID: 27955872.
29. Smith RS, Sundaramurthy SR, Croagh D. Laparoscopic versus open repair of perforated peptic ulcer: A retrospective cohort study. Asian J Endosc Surg. 2019 Apr;12(2):139-144. doi: 10.1111/ases.12600. Epub 2018 May 27. PMID: 29806098.
30. Sø JB, Kum CK, Fernandes ML, Goh P. Comparison between laparoscopic and conventional omental patch repair for perforated duodenal ulcer. Surg Endosc. 1996 Nov;10(11):1060-3. doi: 10.1007/s004649900240. PMID: 8881052.
31. Stepanyan SA, Petrosyan AA, Safaryan HH, Yeghiazaryan HH, Aleksanyan AY, Hakobyan VM, Papazyan KT, Mkrtchyan MH. Laparoscopic and open repair for perforated duodenal ulcer: single-center experience. Wideochir Inne Tech Maloinwazyjne. 2019 Jan;14(1):60-69. doi: 10.5114/wiitm.2018.76281. Epub 2018 Jun 11. PMID: 30766630; PMCID: PMC6372872.
32. Zogovic S, Bojesen AB, Andos S, Mortensen FV. Laparoscopic repair of perforated peptic ulcer is not prognostic factor for 30-day mortality (a nationwide prospective cohort study). Int J Surg. 2019 Dec;72:47-54. doi: 10.1016/j.ijsu.2019.10.017. Epub 2019 Oct 19. Erratum in: Int J Surg. 2020 Mar;75:11-12. doi: 10.1016/j.ijsu.2020.01.012. PMID: 31639454.
33. Ates M, Sevil S, Bakircioglu E, Colak C. Laparoscopic repair of peptic ulcer perforation without omental patch versus conventional open repair. J Laparoendosc Adv Surg Tech A. 2007 Oct;17(5):615-9. doi: 10.1089/lap.2006.0195. PMID: 17907974.
34. Bergamaschi R, Mårvik R, Johnsen G, Thoresen JE, Ystgaard B, Myrvold HE. Open vs laparoscopic repair of perforated peptic ulcer. Surg Endosc. 1999 Jul;13(7):679-82. doi: 10.1007/s004649901072. PMID: 10384074.
35. Durai R, Razvi A, Uzkalnis A, Ng PC. Duodenal ulcer perforation: a district hospital experience. Acta Chir Belg. 2011 Jan-Feb;111(1):23-5. doi: 10.1080/00015458.2011.11680698. PMID: 21520783.
36. Katkhouda N, Mavor E, Mason RJ, Campos GM, Soroushyari A, Berne TV. Laparoscopic repair of perforated duodenal ulcers: outcome and efficacy in 30 consecutive patients. Arch Surg. 1999 Aug;134(8):845-8; discussion 849-50. doi: 10.1001/archsurg.134.8.845. PMID: 10443807.
37. Lee FY, Leung KL, Lai PB, Lau JW. Selection of patients for laparoscopic repair of perforated peptic ulcer. Br J Surg. 2001 Jan;88(1):133-6. doi: 10.1046/j.1365-2168.2001.01642.x. PMID: 11136326.
38. Robertson GS, Wemyss-Holden SA, Maddern GJ. Laparoscopic repair of perforated peptic ulcers. The role of laparoscopy in generalised peritonitis. Ann R Coll Surg Engl. 2000 Jan;82(1):6-10. PMID: 10700758; PMCID: PMC2503463.
